# Supplementary material for: Long-term delivery of alendronate through an injectable tetra-PEG hydrogel to promote osteoporosis therapy
Source: Royal Society of Chemistry journal article supplement (doi:10.1039/d0bm00376j), 2020-01-01
Supplement: d0bm00376j1.pdf [file d0bm00376j1.pdf]

## **Long-term delivery of alendronate through injectable tetra-PEG hydrogel to promote osteoporosis therapy**

Dawei Li,<sup>‡a</sup> Jin Zhou,<sup>‡a</sup> Mingming Zhang,<sup>‡b</sup> Yuanzheng Ma,<sup>a</sup> Yanyu Yang,<sup>\*c</sup> Xue Han<sup>\*a</sup> and Xing Wang,<sup>\*d,e</sup>

<sup>a</sup> The 8th Medical Center of Chinese PLA General Hospital, Beijing 100091, China.

<sup>b</sup> PLA Strategic Support Force Characteristic Medical Center, Beijing 100101, China

<sup>c</sup> College of Materials Science and Engineering, Zhengzhou University, Zhengzhou 450052, China

<sup>d</sup> Beijing National Laboratory for Molecular Sciences, Institute of Chemistry, Chinese Academy of Sciences, Beijing 100190, China

<sup>e</sup> University of Chinese Academy of Sciences, Beijing 100049, China

<sup>‡</sup>These authors contributed equally to this work.

E-mail: yyyang@zzu.edu.cn; beryl282004@sina.com; wangxing@iccas.ac.cn

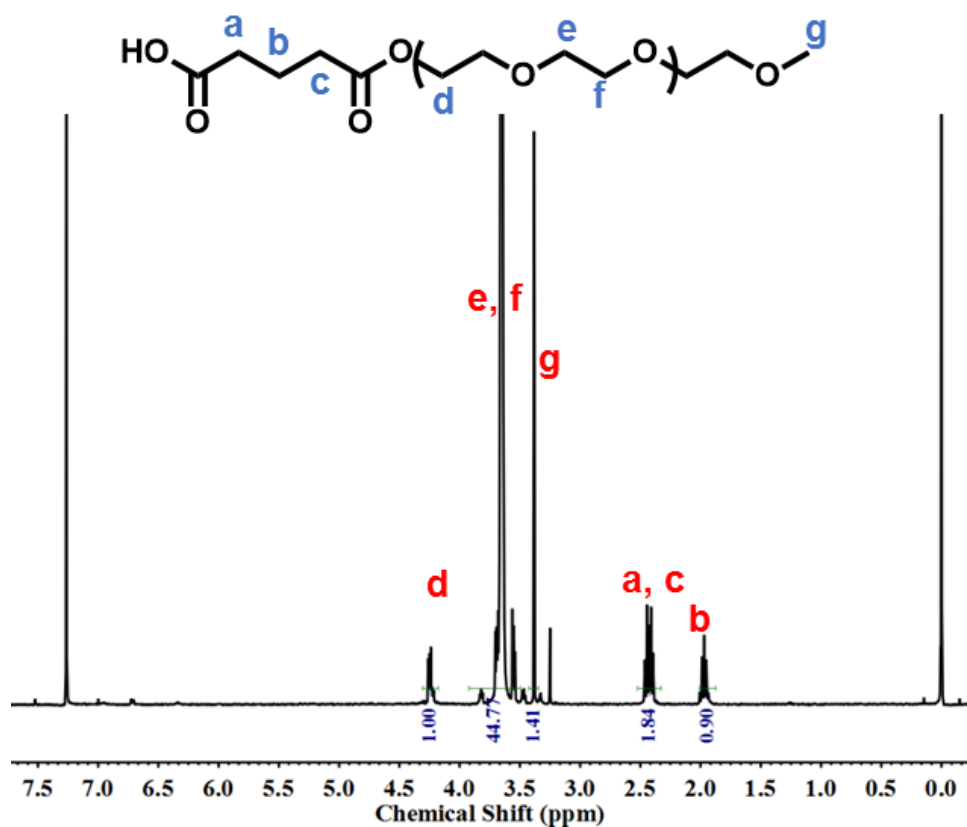

Fig. S1 <sup>1</sup>H NMR spectrum of the PEG-COOH in CDCl<sub>3</sub>.

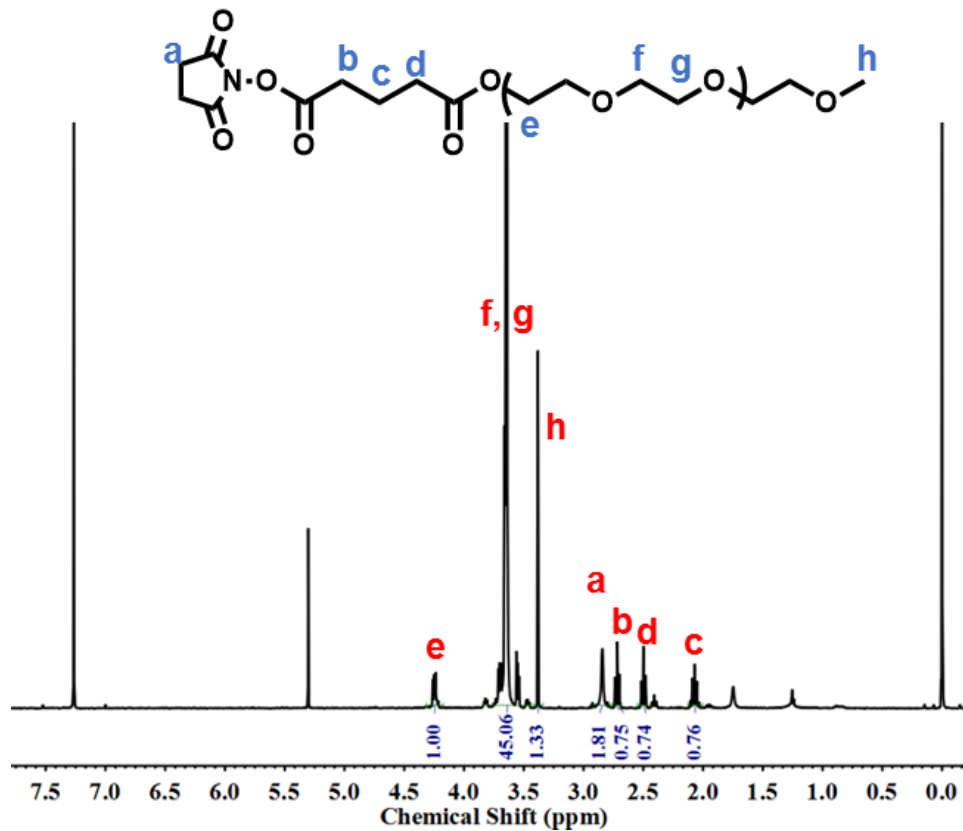

Fig. S2 <sup>1</sup>H NMR spectrum of the PEG-NHS in CDCl<sub>3</sub>.

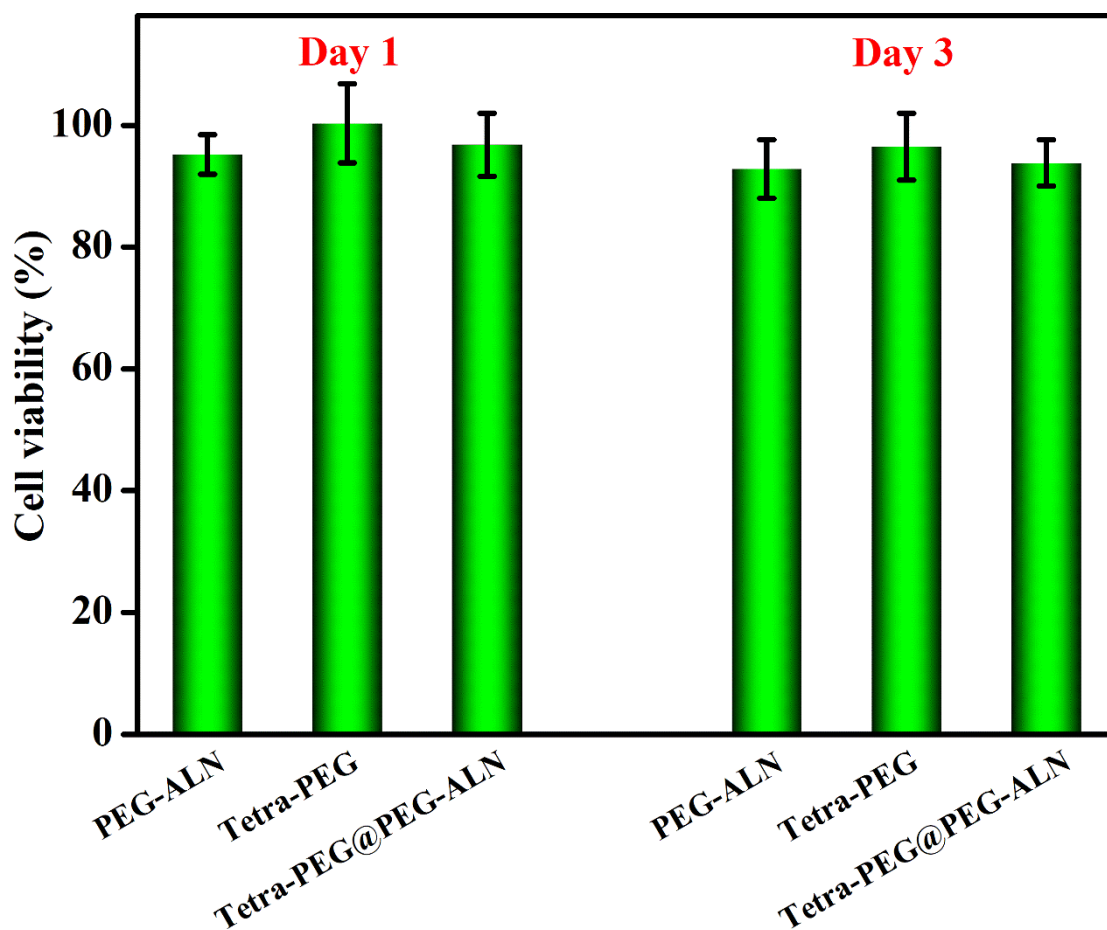

Fig. S3 Cell viability analysis after cultivation for 24 and 72 h.

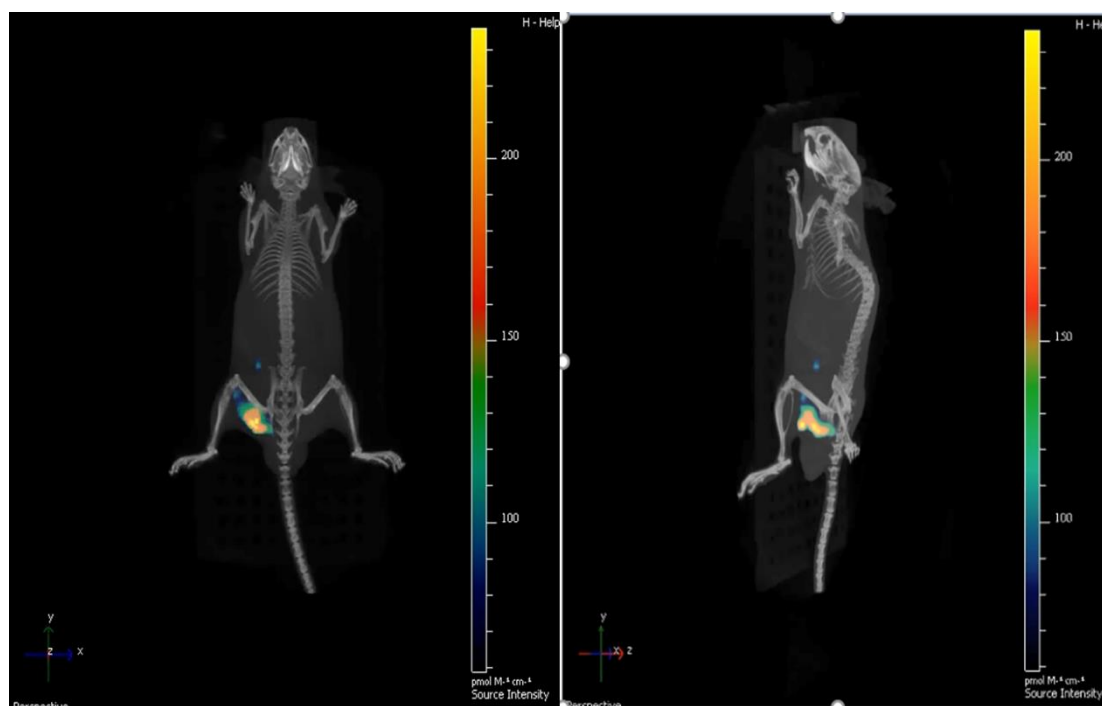

Fig. S4 Three-dimensional fluorescent imaging after injection of tetra-PEG hydrogel.

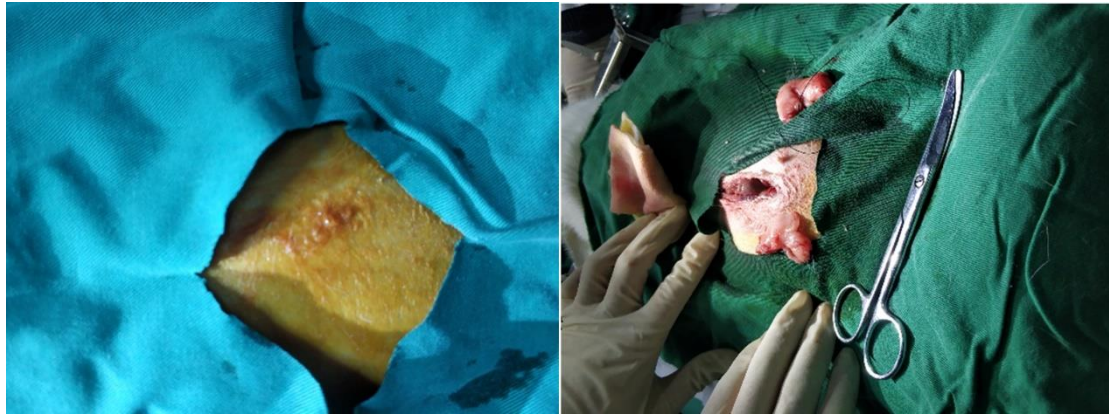

**Fig. S5** Surgery photos of rabbits in the ovariectomized group.
